# Supplementary material
Source: MDPI journal article supplement (https://www.mdpi.com/2075-4442/8/2/13)
Supplement: s1 [file s1]

## Supporting Information

# “Green” Synthesis of Nanocarbons for Reduced Friction and Wear

Maria Sarno <sup>1,2,\*</sup>, Adolfo Senatore <sup>2,3</sup>, Davide Scarpa <sup>3</sup> and Claudia Cirillo <sup>1</sup>

<sup>1</sup> Department of Physics “E.R. Caianiello”, University of Salerno, Via Giovanni Paolo II, 132, 84084, Fisciano (SA), Italy; clcirillo@unisa.it

<sup>2</sup> NANO\_MATES, Research Centre for Nanomaterials and Nanotechnology at the University of Salerno, University of Salerno, Via Giovanni Paolo II, 132, 84084, Fisciano (SA), Italy; a.senatore@unisa.it

<sup>3</sup> Department of Industrial Engineering, University of Salerno, Via Giovanni Paolo II, 132, 84084, Fisciano (SA), Italy; dscarpa@unisa.it

\* Correspondence: msarno@unisa.it; Tel.: +39 089 963460

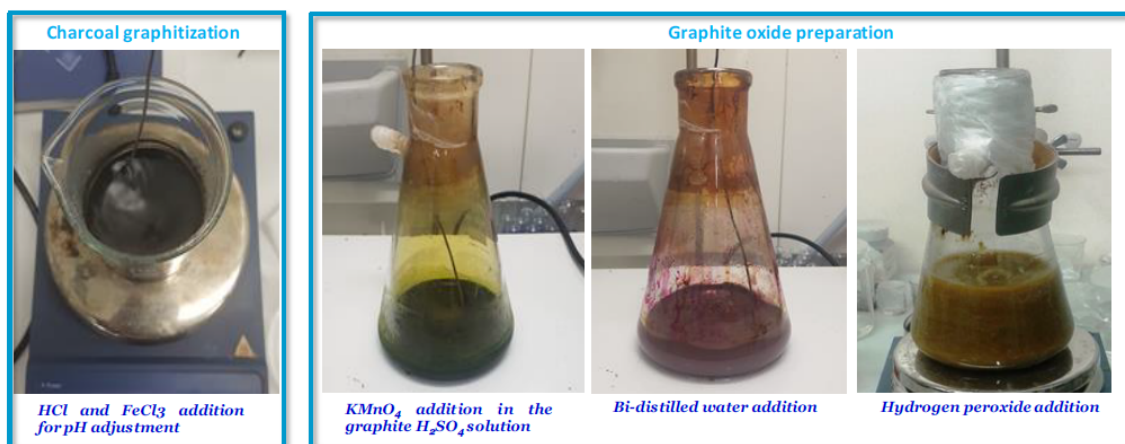

Figure S1. Photos of different synthesis steps.

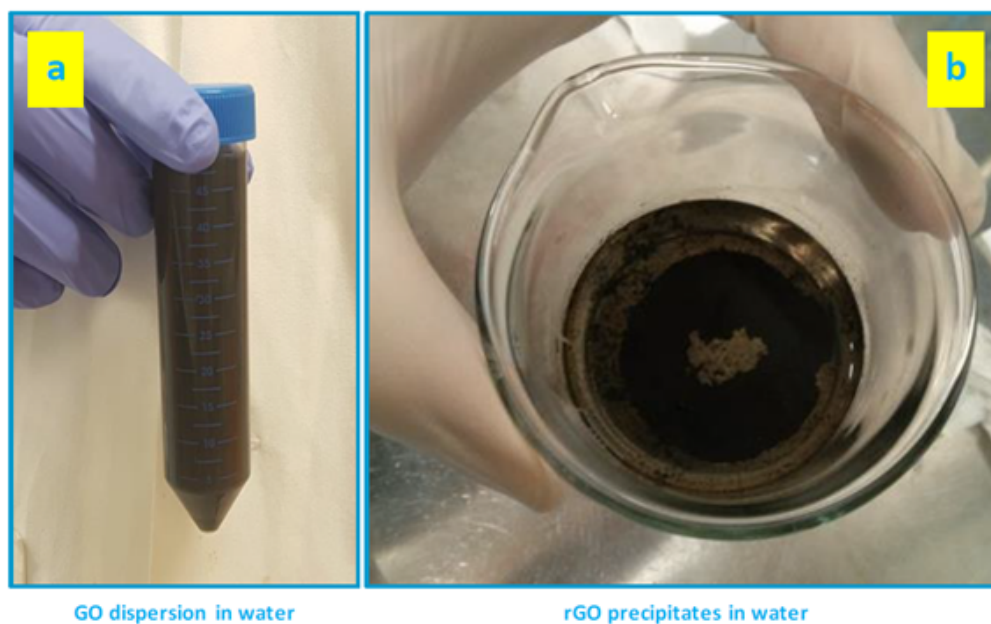

Figure S2. Photos of: GO dispersion in water (a), rGO precipitates in water (b).

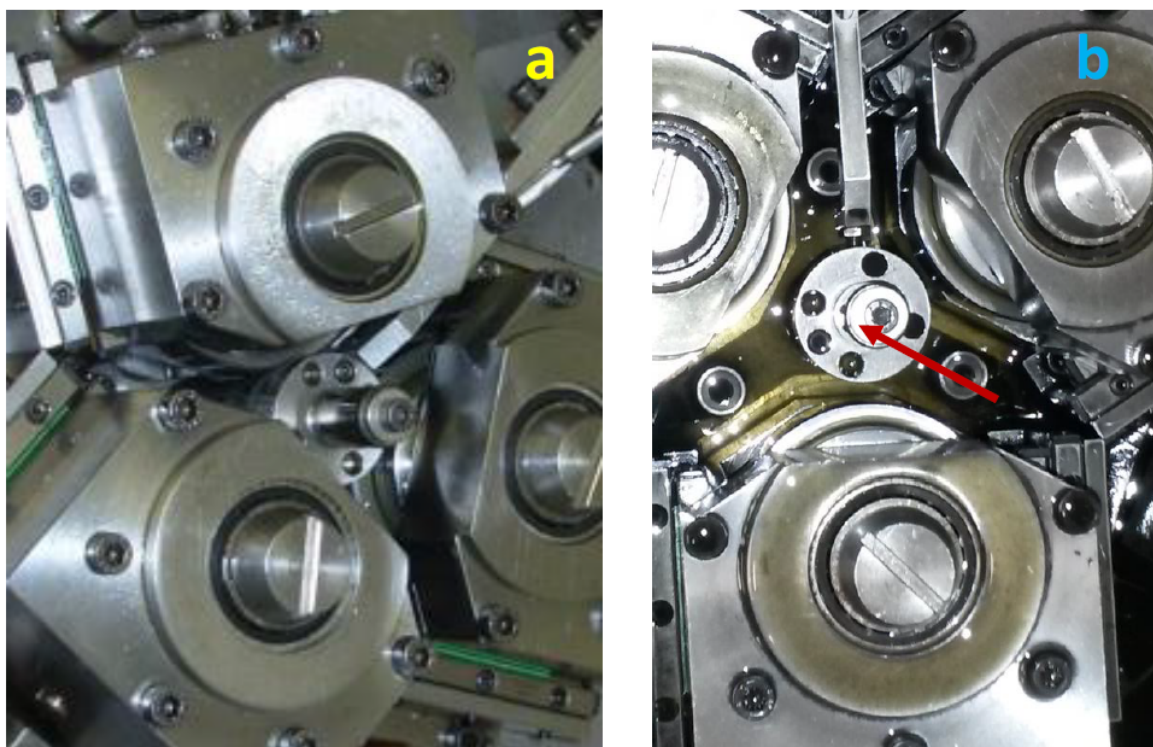

**Figure S3.** Photo of a tribometer 4 disk, clean before lubrication (a); and, after test of 24 h, in the presence of SYNPLUS 75W-90 + SDBS + Tween 80 + few-layer graphene at 0.1 wt. % (b).
